# Supplementary material for: Integrating Prospective LCA in the Development of Automotive Components
Source: MDPI journal article supplement (doi:10.3390/su151310041), 2023-06-25
Supplement: s1 [file s1]

Archive with 1 entries (1 files):
- sustainability-2370509-supplementary.pdf
